# Supplementary material for: Canonical and Divergent N-Terminal HBx Isoform Proteins Unveiled: Characteristics and Roles during HBV Replication
Source: MDPI journal article supplement (doi:10.3390/biomedicines9111701), 2021-11-16
Supplement: s1 [file s1]

| Table S1. Primers utilized to clone HBx isoforms for expression (vector pAcGFP) |                                                   |
|---------------------------------------------------------------------------------|---------------------------------------------------|
| HBX WT Forward                                                                  | 5' -GATCGATCGATCAAGCTTATGGCTGCTCGGTTGTGCTG-3'     |
| HBX WT Reverse                                                                  | 5' -GATCGATCGATCGGTACCGTGGCAGAGGTGAAAAAGTTGCA-3'  |
| HBX F Forward                                                                   | 5' -GATCGATCGATCAAGCTTATGGCTGCTCGGTTGTGCTG-3'     |
| HBX F Reverse                                                                   | 5' -GATCGATCGATCGGTACCGTGGCAGAGGTGAAAAAGTTGCA-3'  |
| HBX M Forward                                                                   | 5' -GATCGATCGATCGATCAAGCTTATGGAGACCACCGTGAACGC-3' |
| HBX M Reverse                                                                   | 5' -GATCGATCGATCGGTACCGTGGCAGAGGTGAAAAAGTTGCA-3'  |
| HBX S Forward                                                                   | 5' -GATCGATCGATCGATCAAGCTTATGACCTGGATCAAAGAATA-3' |
| HBX S Reverse                                                                   | 5' -GATCGATCGATCGGTACCGTGGCAGAGGTGAAAAAGTTGCA-3'  |

| Table S2. Primers utilized in the site-directed mutagenesis of HBx |                                              |
|--------------------------------------------------------------------|----------------------------------------------|
| Q8stop Forward                                                     | 5' -CTCGGTTGTGCTGCTAACTGGATCCTGCG-3'         |
| Q8stop Reverse                                                     | 5' -CGCAGGATCCAGTTAGCAGCACAAACCGAG-3'        |
| M79V Forward                                                       | 5' -CTCTGCACGTCGCGTGGAGACCACCGT-3'           |
| M79V Reverse                                                       | 5' -ACGGTGGTCTCCACGCGACGTGCAGAG-3'           |
| M105V Forward                                                      | 5' -GACTTTCAGGAAGGTCAGTCACCTGGATCAAAGAATA-3' |
| M105V Reverse                                                      | 5' -TATTCCTTGATCCAGGTGACTGACCTTCCTGAAAGTC-3' |

| Table S3. Primers utilized in the detection of HBV DNA intermediates |                               |
|----------------------------------------------------------------------|-------------------------------|
| BCP Forward                                                          | 5'-GGAAGGTCAATGACCTGGATC-3'   |
| BCP Reverse                                                          | 5'-ATGCCTACAGCCTCCTAATAC-3'   |
| cccDNA Forward                                                       | 5'-ACTCTTGACTTTCAGGAAGG-3'    |
| cccDNA Reverse                                                       | 5'-TCTTTATAAGGGTCAATGTCCAT-3' |

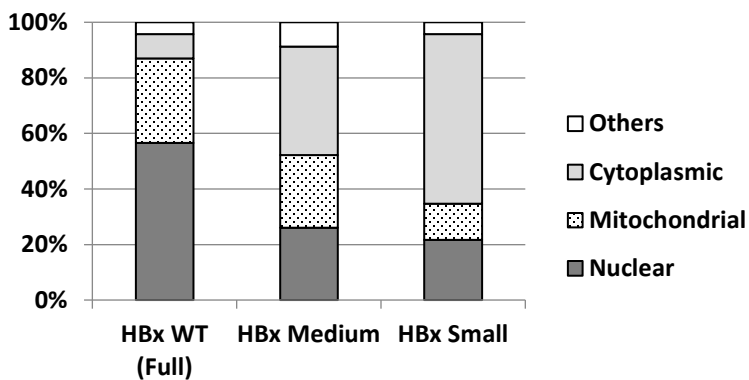

Figure S1. PSORT II predicted subcellular localization of HBx isoforms.

HBV HBx genotype F1b (Genebank KM233681.1) primary sequences of Full-length (154 amino acids), Medium-length (amino acids region 79 to 154) or Small-length (amino acids region 105 to 154) isoform proteins were introduced into the server, and the subcellular localization results were plotted.

**Table S4. Mapped HBx protein-protein interactions involving COMMD8-similarity region**

| <b>Mapped HBx PPIs involved in transcription, and chromatin regulation</b> |                                                            |                                                                                                                                        |                                |
|----------------------------------------------------------------------------|------------------------------------------------------------|----------------------------------------------------------------------------------------------------------------------------------------|--------------------------------|
| <b>HBx residues region</b>                                                 | <b>Binding partner</b>                                     | <b>Properties</b>                                                                                                                      | <b>PMID</b>                    |
| 47 to 133                                                                  | E2F transcription factor 1                                 | Role in control of the cell cycle and action of tumor suppressor proteins                                                              | 11244564                       |
| 51 to 154                                                                  | NF-AT1, nuclear factor of activated T cells 2              | Transcription factor with roles in development and function of the immune system                                                       | 12202232                       |
| 51 to 154                                                                  | ASC-2, Activating signal cointegrator 2                    | Transcriptional coactivator for nuclear hormone receptors                                                                              | 14578865                       |
| 52 to 102                                                                  | SUV39H1, histone-lysine N-methyltransferase                | Tri-methylates lysine 9 of histone H3, resulting in transcriptional silencing                                                          | 32514521                       |
| 57 to 154                                                                  | HIF-1 $\alpha$                                             | Transcriptional regulation of angiogenic factors                                                                                       | 15527772                       |
| 73 to 120                                                                  | Estrogen receptor $\alpha$                                 | Transcriptional regulation of target genes                                                                                             | 16757575                       |
| 81 to 120                                                                  | BAF155 complex subunit                                     | Chromatin remodeling, member of SWI/SNF family, display helicase and ATPase activities to regulate transcription by altering chromatin | 31533543                       |
| 100 to 120                                                                 | FXR, farnesoid X nuclear receptor                          | Ligand-activated transcription factor                                                                                                  | 28102638                       |
| 110 to 143                                                                 | TFIIH, general transcription factor                        | DNA helicase components ERCC2 and ERCC3                                                                                                | 8855220<br>21375739<br>8670843 |
| 111 to 114, YFKD motif                                                     | NF-Kappa-B Subunit p65, RELA                               | Nuclear transcription factor                                                                                                           | 20010875<br>21459755           |
| 112 to 133                                                                 | Id1 and Id3, inhibitor of differentiation 1 and 3 proteins | HLH proteins, transcriptional regulators                                                                                               | 32305567                       |
| 131 to 134, VFVL motif                                                     | c-Myc, proto-oncogene                                      | BHLH transcription factor, roles in cell cycle progression, apoptosis and cellular transformation                                      | 26165841                       |
| 131 to 154                                                                 | SMYD3 protein                                              | Histone methyltransferase SET and MYND domain-containing protein 3                                                                     | 26616333                       |
| <b>Mapped HBx PPIs with organelle-resident proteins</b>                    |                                                            |                                                                                                                                        |                                |
| <b>HBx residues region</b>                                                 | <b>Binding partner</b>                                     | <b>Properties</b>                                                                                                                      | <b>PMID</b>                    |
| 72 to 117                                                                  | COXIII, mitochondrially encoded cytochrome C oxidase III   | Enzyme of the mitochondrial electron transport chain which drives oxidative phosphorylation                                            | 25483779                       |
| 73 to 154                                                                  | MAVS, mitochondrial antiviral signaling protein            | Required in the virus-triggered beta interferon signaling pathways                                                                     | 20554965                       |
| 88 to 117                                                                  | Hsp60, mitochondrial chaperonin                            | Role in folding and assembly of newly imported proteins in the mitochondria                                                            | 15120623                       |
| 110 to 154                                                                 | Hepatocystin/80K-H                                         | Beta-subunit of glucosidase II, an N-linked glycan-processing enzyme in the endoplasmic reticulum.                                     | 23644164                       |
| 137 to 140, CRHK motif                                                     | HBXIP                                                      | Late endosomal/lysosomal adaptor, MAPK and MTOR activator 5                                                                            | 18032378                       |
| <b>Mapped HBx PPIs with cell proteins of other processes</b>               |                                                            |                                                                                                                                        |                                |
| <b>HBx residues region</b>                                                 | <b>Binding partner</b>                                     | <b>Properties</b>                                                                                                                      | <b>PMID</b>                    |
| 51 to 154                                                                  | hBubR1, BUB1 mitotic checkpoint                            | Kinase involved in spindle checkpoint function                                                                                         | 18193091<br>23536579           |
| 84 to 144                                                                  | Proteasome complex                                         | Protein complexes that degrade proteins                                                                                                | 11710562                       |
| 88 to 100                                                                  | UV-DDB 1, damage specific DNA binding protein 1            | Role in DNA repair and protein ubiquitination                                                                                          | 19966799                       |
| K91, K95, K113, K118, K130                                                 | Ubiquitination sites                                       | Ubiquitination targets protein for destruction                                                                                         | 18155658                       |
| 100 to 128                                                                 | TRIM14, tripartite motif protein                           | Role in the innate immune defense against viruses and bacteria                                                                         | 30150992                       |
| 102 to 136                                                                 | p53                                                        | Tumor suppressor                                                                                                                       | 9371515                        |
| 113 to 135                                                                 | Bcl-2 and Bcl-xl                                           | Anti-apoptotic proteins of the Bcl-1 family                                                                                            | 26858413                       |
